# Supplementary material for: Promising Strategies for Preserving Adult Endothelium Health and Reversing Its Dysfunction: From the Liquid Biopsy to New Omics Technologies and Non-invasive Circulating Biomarkers
Source: Preprints.org preprint supplement (doi:10.20944/preprints202206.0403.v1), 2022-06-29

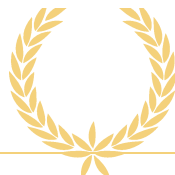

We certify that the following article

**Promising strategies for Preserving Adult Endothelium Health and Reversing its Dysfunction: from the Liquid biopsy to new omics technologies and non-invasive circulating biomarkers**

**Carmela Balistreri**

has undergone English language editing by MDPI. The text has been checked for correct use of grammar and common technical terms, and edited to a level suitable for reporting research in a scholarly journal.

MDPI uses experienced, native English speaking editors. Full details of the editing service can be found at

► <https://www.mdpi.com/authors/english>.

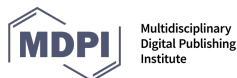

Basel, Switzerland  
June 2022

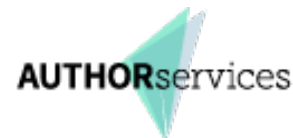

Supplement: Supplementary file 1 [file supplementary]
